# Supplementary material for: Deep Learning Approach for Evaluating Lumbar Intervertebral Disc Degeneration: Achieving High Accurate Segmentation for Quantitative Analysis on MRI
Source: Research Square preprint supplement (doi:10.21203/rs.3.rs-864336/v1), 2021-09-02
Supplement: Supplementary file 2 [file 52961dfec0ecfaff32895209.docx]

**Table 4 Mean and standard deviation (σ) of HDR of healthy discs for each lumbar level and each gender and age**

| **age** | | | **20-30** | **30-40** | **40-50** | **50-60** | **60-70** | **70-90** |
| --- | --- | --- | --- | --- | --- | --- | --- | --- |
| female | mean | L1L2 | 0.2209 | 0.2218 | 0.2279 | 0.2310 | 0.2293 | 0.2024 |
| L2L3 | 0.2313 | 0.2488 | 0.2454 | 0.2494 | 0.2292 | 0.2483 |
| L3L4 | 0.2534 | 0.2629 | 0.2606 | 0.2448 | 0.2377 | 0.2234 |
| L4L5 | 0.2647 | 0.2688 | 0.2570 | 0.2434 | 0.2385 | 0.2308 |
| L5S1 | 0.2532 | 0.2584 | 0.2654 | 0.2683 | 0.2571 | 0.2296 |
| std | L1L2 | 0.0285 | 0.0358 | 0.0398 | 0.0338 | 0.0283 | 0.0484 |
| L2L3 | 0.0214 | 0.0963 | 0.0282 | 0.0914 | 0.0260 | 0.1108 |
| L3L4 | 0.0255 | 0.0377 | 0.0249 | 0.0326 | 0.0261 | 0.0344 |
| L4L5 | 0.0329 | 0.0345 | 0.0312 | 0.0361 | 0.0309 | 0.0289 |
| L5S1 | 0.0404 | 0.0444 | 0.0490 | 0.0373 | 0.0597 | 0.0522 |
| male | mean | L1L2 | 0.2111 | 0.2213 | 0.2302 | 0.2686 | 0.2242 | 0.2202 |
| L2L3 | 0.2270 | 0.2399 | 0.2389 | 0.2518 | 0.2535 | 0.2646 |
| L3L4 | 0.2478 | 0.2552 | 0.2518 | 0.2447 | 0.2377 | 0.2324 |
| L4L5 | 0.2517 | 0.2554 | 0.2534 | 0.2475 | 0.2305 | 0.2203 |
| L5S1 | 0.2340 | 0.2430 | 0.2431 | 0.2475 | 0.2626 | 0.2414 |
| std | L1L2 | 0.0277 | 0.0529 | 0.0640 | 0.2721 | 0.0725 | 0.0344 |
| L2L3 | 0.0361 | 0.0431 | 0.0341 | 0.0774 | 0.1435 | 0.2789 |
| L3L4 | 0.0259 | 0.0246 | 0.0276 | 0.0460 | 0.0528 | 0.0241 |
| L4L5 | 0.0297 | 0.0361 | 0.0293 | 0.0533 | 0.0340 | 0.0424 |
| L5S1 | 0.0333 | 0.0310 | 0.0373 | 0.0410 | 0.0427 | 0.0520 |
