# Supplementary material for: Deep Learning Approach for Evaluating Lumbar Intervertebral Disc Degeneration: Achieving High Accurate Segmentation for Quantitative Analysis on MRI
Source: Research Square preprint supplement (doi:10.21203/rs.3.rs-864336/v1), 2021-09-02
Supplement: Supplementary file 4 [file 6a62f702869f0211e956ba77.docx]

### Quantitative analysis of IVD degeneration

IVD degeneration is quantitated based on both signal intensity peak difference and geometric parameter, which indicates water content and weight-bearing capacity. The signal intensity peak deviation degree from the center () was calculated to describe the water content loss status with IVD degeneration. According to the established healthy intervertebral disc signal intensity peak difference and geometric parameter standard, the signal intensity decrease and the degree of high collapse of the intervertebral disc are quantitatively analyzed.

**Qualitative grading：**According to the established standard of the Modified Pfirrmann Grading System (level 1, 2, 3, 4, 5-8) of the disc , calculate the deviation degree (in units of standard deviations, ) of the disc from the center of the standard range of each grade. The intervertebral disc is graded by judging the degree of deviation（） from the center of the adjacent range **(Fig. 3a)**, and the calculation equation is:

(1)

Where is the current peak signal intensity difference of the intervertebral disc, and are the mean and standard deviation of the standard signal intensity peak difference of the th level, and is 1 to 4.

**quantitative analysis ：**According to the established healthy intervertebral disc signal intensity peak difference and geometric parameter standard**(Fig. 3b-e)**, the signal intensity degeneration and the degree of high collapse of the intervertebral disc are quantitatively analyzed. For the original parameter DH, the ratio of the current DH to the average DH of the corresponding healthy intervertebral disc is used to calculate the collapse percentage. For the non-original parameters , DHI and HDR, which involve the influence of variables such as vertebral body height and intervertebral disc diameter, the same method as J.Jarman et al. is used to calculate the degree of deviation from the range center of the corresponding healthy intervertebral disc height parameter[1]:

(2)

Where represents the degree of deviation between the kth non-original parameter and the mean value of the corresponding healthy intervertebral disc parameter, and k is from 1 to 3. When is smaller, the degree of signal intensity of the intervertebral disc degenerates or the collapse is higher. represents gender, which is 0 or 1, and represents structure position.

# References

[1] J. P. Jarman, V. E. Arpinar, D. Baruah, A. P. Klein, D. J. Maiman, and L. Tugan Muftuler, “Intervertebral disc height loss demonstrates the threshold of major pathological changes during degeneration,” *Eur. Spine J.*, vol. 24, no. 9, pp. 1944–1950, 2015, doi: 10.1007/s00586-014-3564-8.
