# Supplementary material for: Deep Learning Approach for Evaluating Lumbar Intervertebral Disc Degeneration: Achieving High Accurate Segmentation for Quantitative Analysis on MRI
Source: Research Square preprint supplement (doi:10.21203/rs.3.rs-864336/v1), 2021-09-02
Supplement: Supplementary file 5 [file 887d5d78e9f25ae3a7bd358b.docx]

**Table 1 Mean and standard deviation (σ) of of healthy discs for each lumbar level and each age**

| **age** | | **20-30** | **30-40** | **40-50** | **50-60** | **60-70** | **70-90** |
| --- | --- | --- | --- | --- | --- | --- | --- |
| mean | L1L2 | 98.30 | 99.03 | 95.35 | 87.28 | 94.59 | 98.30 |
| L2L3 | 92.82 | 90.59 | 84.83 | 86.13 | 91.63 | 92.82 |
| L3L4 | 86.30 | 83.31 | 76.02 | 73.88 | 86.62 | 86.30 |
| L4L5 | 81.46 | 71.98 | 65.47 | 58.04 | 80.47 | 81.46 |
| L5S1 | 69.84 | 60.41 | 42.72 | 38.48 | 73.72 | 69.84 |
| std | L1L2 | 17.92 | 15.50 | 18.55 | 21.70 | 25.09 | 17.92 |
| L2L3 | 18.99 | 16.03 | 23.19 | 19.94 | 22.35 | 18.99 |
| L3L4 | 20.47 | 22.88 | 17.73 | 20.80 | 20.37 | 20.47 |
| L4L5 | 20.61 | 21.42 | 21.77 | 29.57 | 20.14 | 20.61 |
| L5S1 | 28.56 | 23.66 | 16.16 | 35.90 | 22.14 | 28.56 |
