# Supplementary material for: Deep Learning Approach for Evaluating Lumbar Intervertebral Disc Degeneration: Achieving High Accurate Segmentation for Quantitative Analysis on MRI
Source: Research Square preprint supplement (doi:10.21203/rs.3.rs-864336/v1), 2021-09-02
Supplement: Supplementary file 6 [file 91694c255c146809d4d1a3b5.docx]

**Table 3 Mean and standard deviation (σ) of DHI of healthy discs for each lumbar level and each gender and age**

| **age** | | | **20-30** | **30-40** | **40-50** | **50-60** | **60-70** | **70-90** |
| --- | --- | --- | --- | --- | --- | --- | --- | --- |
| female | mean | L1L2 | 0.2640 | 0.2713 | 0.2793 | 0.2964 | 0.3057 | 0.2816 |
| L2L3 | 0.2929 | 0.3138 | 0.3162 | 0.3390 | 0.3295 | 0.3607 |
| L3L4 | 0.3311 | 0.3465 | 0.3530 | 0.3574 | 0.3623 | 0.3582 |
| L4L5 | 0.3639 | 0.3784 | 0.3673 | 0.3750 | 0.3699 | 0.3673 |
| L5S1 | 0.3337 | 0.3455 | 0.3586 | 0.3838 | 0.3742 | 0.3435 |
| std | L1L2 | 0.0435 | 0.0614 | 0.0399 | 0.0497 | 0.0462 | 0.0647 |
| L2L3 | 0.0388 | 0.0779 | 0.0404 | 0.0604 | 0.0479 | 0.1222 |
| L3L4 | 0.0411 | 0.0472 | 0.0342 | 0.0441 | 0.0537 | 0.0443 |
| L4L5 | 0.0502 | 0.0539 | 0.0420 | 0.0523 | 0.0507 | 0.0423 |
| L5S1 | 0.0578 | 0.0644 | 0.0671 | 0.0602 | 0.0903 | 0.0727 |
| male | mean | L1L2 | 0.2801 | 0.2905 | 0.3063 | 0.3314 | 0.3178 | 0.3162 |
| L2L3 | 0.3156 | 0.3334 | 0.3368 | 0.3649 | 0.3674 | 0.3594 |
| L3L4 | 0.3539 | 0.3660 | 0.3694 | 0.3726 | 0.3757 | 0.3764 |
| L4L5 | 0.3843 | 0.3816 | 0.3861 | 0.3870 | 0.3751 | 0.3638 |
| L5S1 | 0.3375 | 0.3382 | 0.3493 | 0.3713 | 0.3811 | 0.3619 |
| std | L1L2 | 0.0360 | 0.0556 | 0.0715 | 0.1177 | 0.0906 | 0.0523 |
| L2L3 | 0.0556 | 0.0675 | 0.0490 | 0.1068 | 0.1224 | 0.1020 |
| L3L4 | 0.0410 | 0.0508 | 0.0455 | 0.0665 | 0.0540 | 0.0472 |
| L4L5 | 0.0415 | 0.0505 | 0.0517 | 0.0605 | 0.0519 | 0.0674 |
| L5S1 | 0.0491 | 0.0589 | 0.0597 | 0.0666 | 0.0657 | 0.0819 |
